# Supplementary material for: Bifidobacterium infantis associates with T cell immunity in human infants and is sufficient to enhance antigen-specific T cells in mice
Source: PubMed Central journal article supplement (PMC10708209; doi:10.1126/sciadv.ade1370), 2023-12-08

Supplementary Materials for

***Bifidobacterium infantis* associates with T cell immunity in human infants and is sufficient to enhance antigen-specific T cells in mice**

Donald D. Nyangahu *et al.*

Corresponding author: Donald D. Nyangahu, [donaldnyangahu@gmail.com](mailto:donaldnyangahu@gmail.com); Heather B. Jaspán, [hbjaspán@gmail.com](mailto:hbjaspán@gmail.com)

*Sci. Adv.* **9**, eade1370 (2023)  
DOI: 10.1126/sciadv.ade1370

**The PDF file includes:**

Legends for figs. S1 to S3  
Legends for tables S1 to S11  
Figs. S1 to S3

**Other Supplementary Material for this manuscript includes the following:**

Tables S1 to S11

**Figure S1: Flow cytometry gating strategy for whole blood assay to measure BCG response in human infants.** Related to Figure 1.

**Figure S2: High versus low responder infant gut microbiota differentially impact splenic immune development in recipient gnotobiotic neonatal mice.** Germ-free pups were gavaged with fecal slurry from a high responder infant (HR), low responder infant (LR) or PBS alone. Immune analyses was performed in the spleen. **(A)** Experimental schema of fecal microbiota transplantation (FMT) on to neonatal germ-free mice. **(B&C)** Body weights and spleen cellularity. **(D)** Representative flow plot showing gating strategy to determine frequencies of neutrophils (Ly6G+), Ly6Clow and Ly6Chigh monocytes in HR versus LR gavaged animals. **(E-G)** Frequencies of Ly6Chigh, Ly6Clow monocytes and Ly6G+ neutrophils. **(I)** Representative flow plot of gating for effector memory, central memory and naive CD4+ T cells **(I-K)** Proportions of naive, effector memory and central memory CD4+ T cells. **(L-M)** Gating of total CD4 memory cells and proportions of total CD4 memory cells (CD4+CD44high). Data are shown from two experiments with each experiment utilizing stool sets from different HR and LR infants. Mean values  $\pm$ SEM are plotted (\* $p < 0.05$ , \*\* $p < 0.01$ , \*\*\* $p < 0.001$ ).

**Figure S3: Propidium Monoazide (PMA) qPCR experiments in SPF and GF mice orally gavaged with live or heat-killed bacteria.** **(A)** Ct values of DNA extracted from stool with and without PMA treatment obtained from germ-free mice gavaged with *B. infantis*, heat-killed *B. infantis* or PBS. Analysis done at day 14 of life using *B. infantis* specific qPCR. **(B)** Ct values of DNA extracted from stool with and without PMA treatment obtained from germ-free mice gavaged with *B. thetaiotaomicron* or PBS. Analysis done at day 14 of life using *B. thetaiotaomicron* specific qPCR. **(C)** Ct values of DNA extracted from stool with and without PMA treatment obtained from SPF mice gavaged with *B. infantis* or PBS. Analysis done 6 hours after oral gavage using *B. infantis* specific qPCR. **(D)** Ct values of DNA extracted from stool with and without PMA treatment obtained from SPF mice gavaged with *B. thetaiotaomicron* or PBS. Analysis done 6 hours after oral gavage using *B. thetaiotaomicron* specific qPCR. **(E)** Ct values of DNA extracted from stool with and without PMA treatment in SPF mice gavaged with *B. infantis* or PBS. Analysis done 72 hours after oral gavage using *B. infantis* specific qPCR. **(F)** Ct values of DNA extracted from stool with and without PMA treatment obtained from SPF mice gavaged with *B. thetaiotaomicron* or PBS. Analysis done 72 hours after oral gavage using *B. thetaiotaomicron* specific qPCR.

**Table S1: Mother and Infant characteristics.** Related to Figure 1.

**Table S2: Differentially abundant taxa in stool of high or low vaccine responders early in life.** Related to Figure 2

**Table S3: Differentially abundant metabolites between *Bifidobacterium infantis* and *Bacteroides thetaiotaomicron* gavaged mice.** Related to Figure 6

**Table S4: Differentially abundant metabolites between *Bifidobacterium infantis* and PBS gavaged mice.** Related to Figure 6

**Table S5: Differentially abundant metabolites between *Bifidobacterium infantis* and heat-killed *Bifidobacterium infantis* gavaged mice.** Related to Figure 6

**Table S6: PLS-DA analysis of metabolites across all groups ordered by variable importance projection score.** Related to Figure 6

**Table S7: Metabolic pathways enriched in *Bifidobacterium infantis* gavaged mice. Related to Figure 6**

**Table S8: Metabolic pathways enriched in *Bacteroides thetaiotaomicron* gavaged mice. Related to Figure 6**

**Table S9: Differentially expressed genes in colon between *Bifidobacterium infantis* and *Bacteroides thetaiotaomicron* gavaged mice at day 14 of life. Related to Figure 7**

**Table S10: Differentially expressed genes in colon between *Bifidobacterium infantis* and PBS gavaged mice at day 14 of life. Related to Figure 7**

**Table S11: Gene Set Enrichment Analysis (GSEA) of enriched pathways between *Bifidobacterium infantis* and *Bacteroides thetaiotaomicron* gavaged mice. Related to Figure 7**

Figure S1

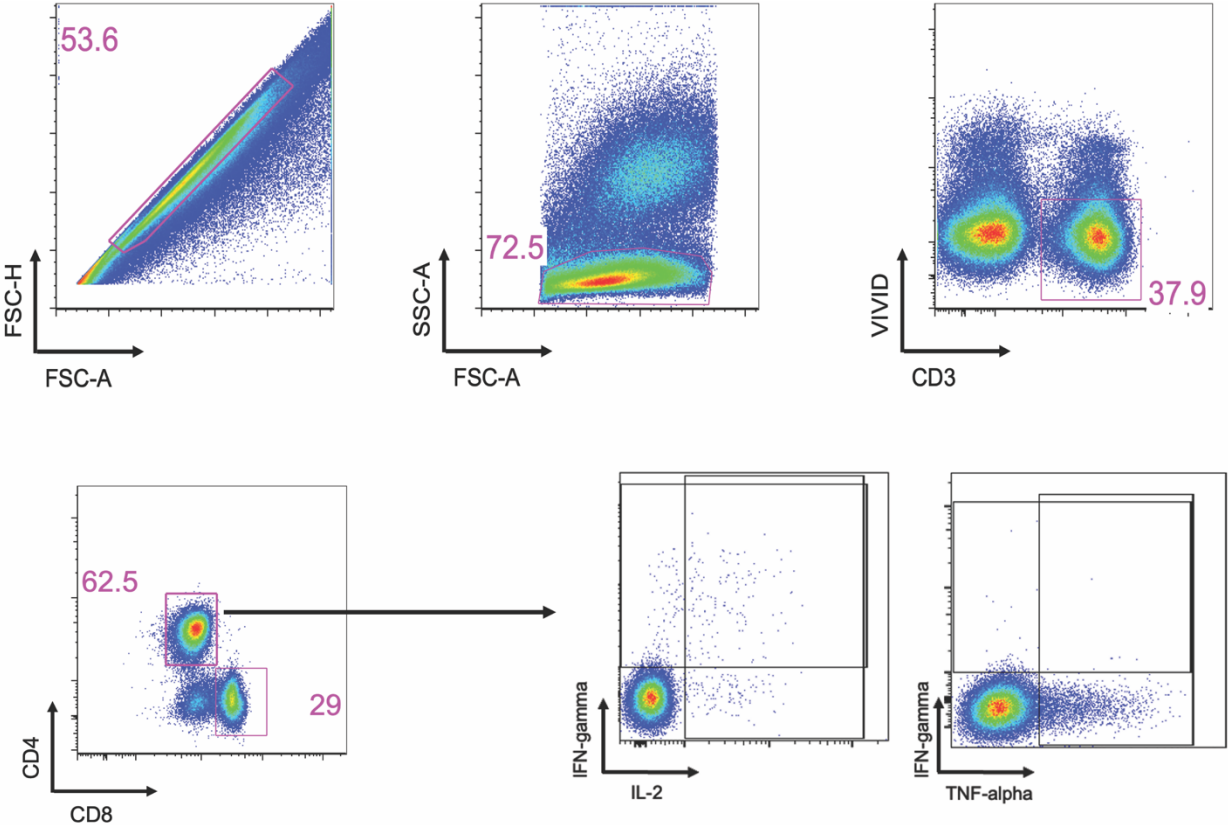

**Figure S2**

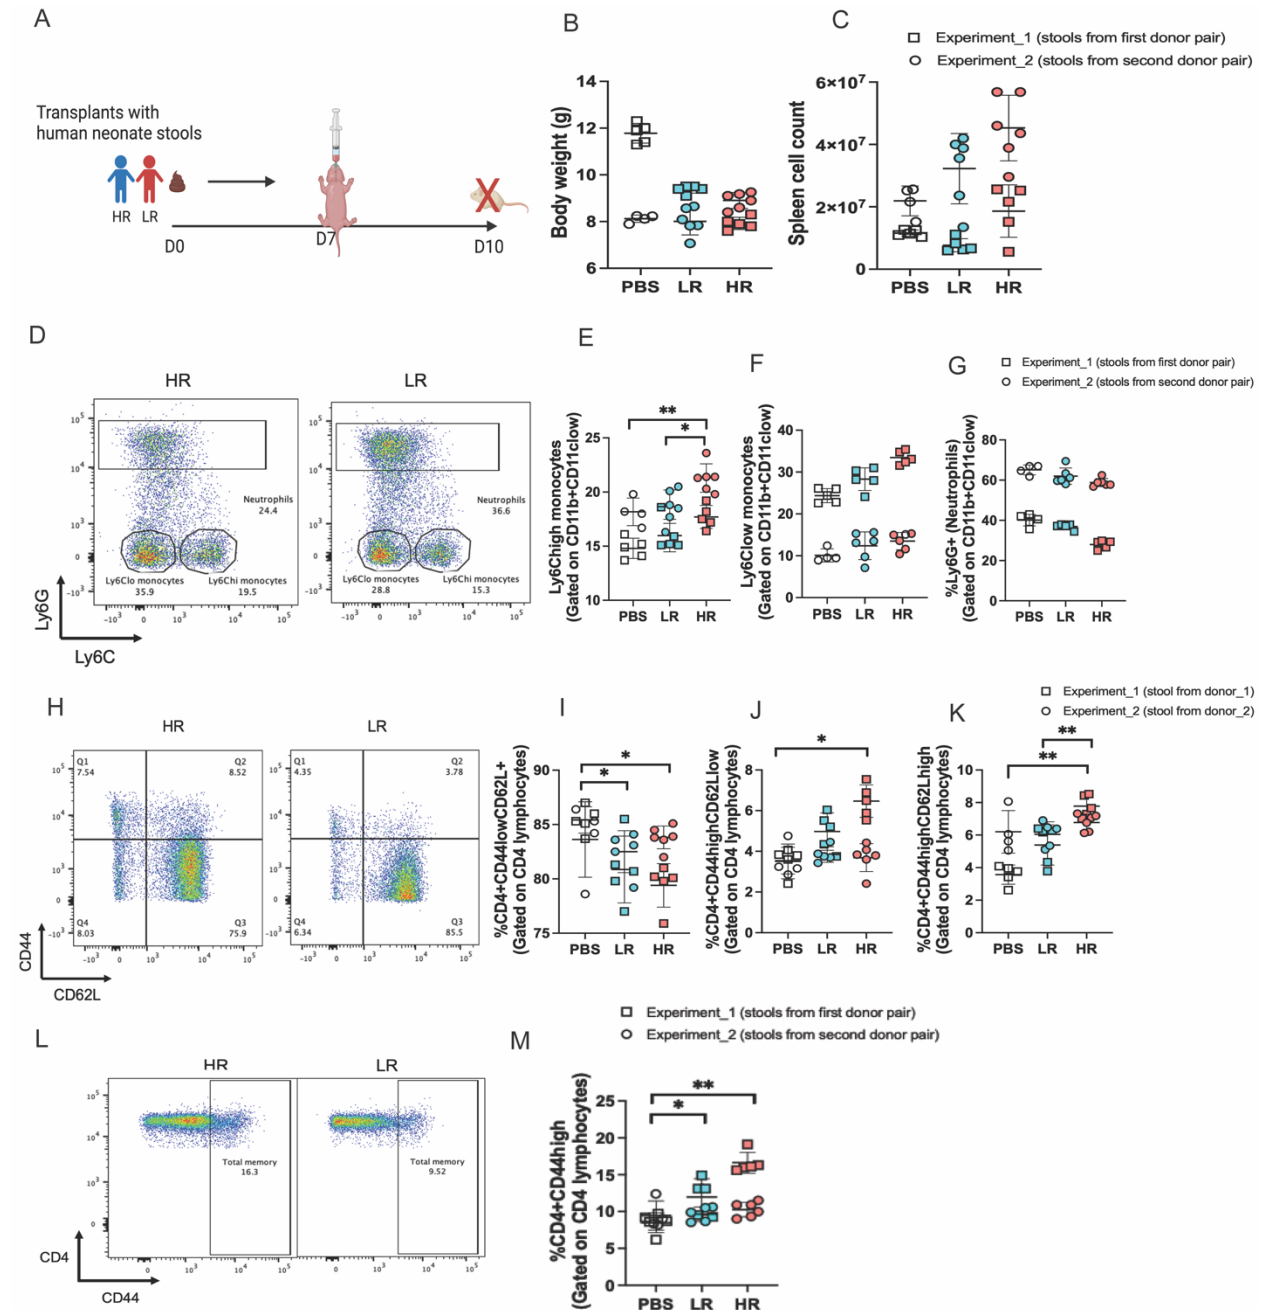

Figure S3

Gnotobiotic mice, day 14 post gavage

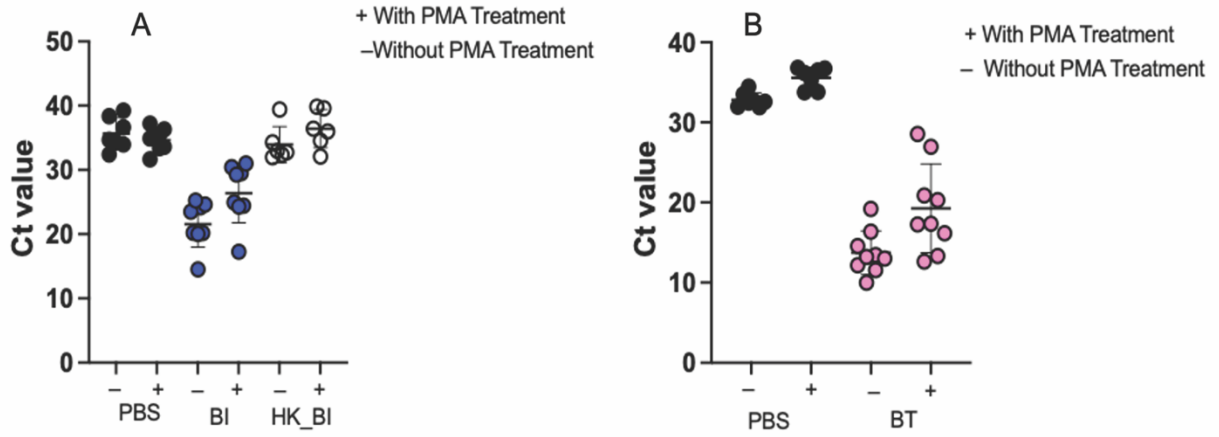

SPF mice, 6 hours post gavage

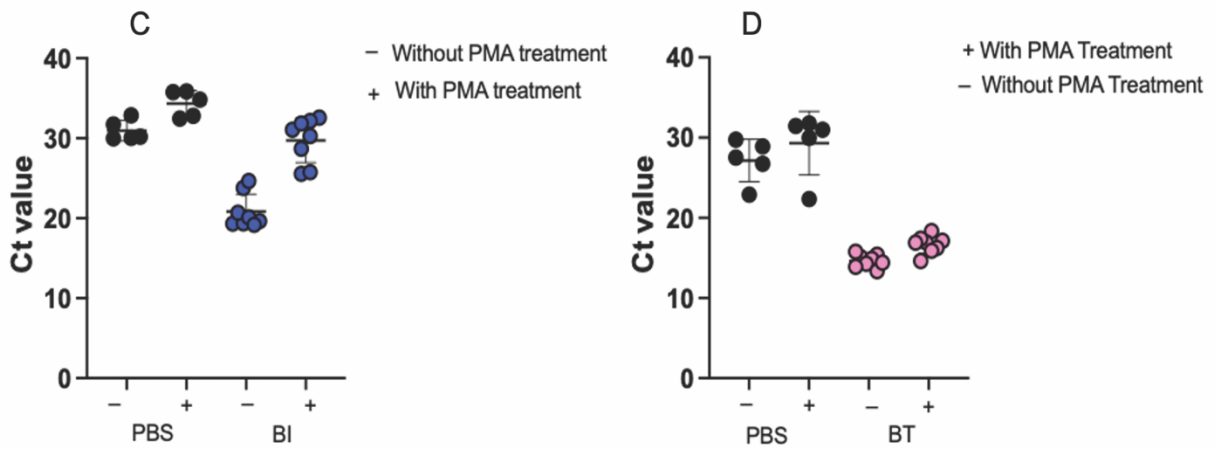

SPF mice, 72 hours post gavage

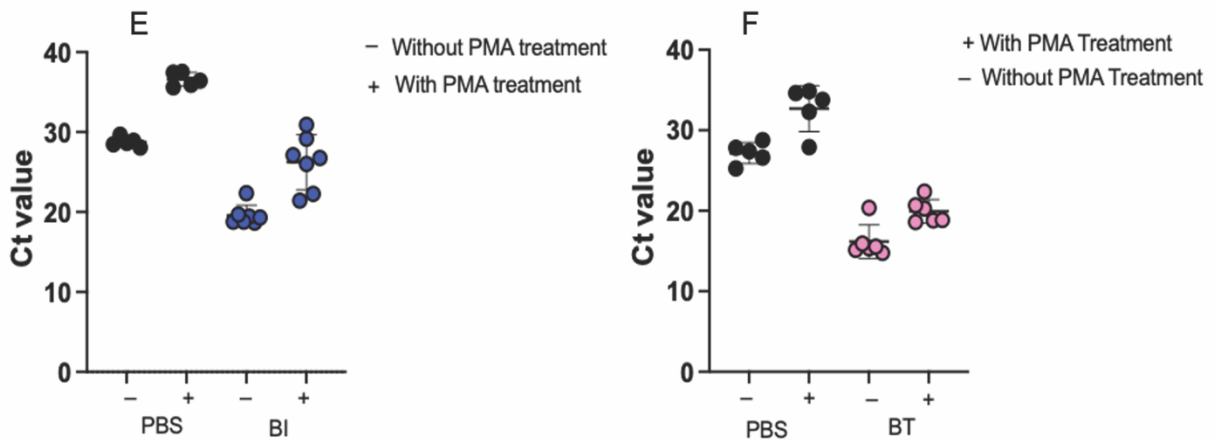

Supplement: sciadv.ade1370_sm.pdf [file sciadv.ade1370_sm.pdf]
